# Supplementary material for: Incomplete pneumolysin oligomers form membrane pores
Source: PubMed Central journal article supplement (PMC4043118; doi:10.1098/rsob.140044), 2014-04-23

Final dataset of 1,953 tomographic sub-volumes

Align with 5 maps, from previous smaller dataset

3 populated classes result

185

955

813

135 pore

545 pore

134 pore

74 prepore

39 prepore

72 pore

491 pore

60 prepore

55 pore

81 prepore

110 prepore

158 prepore

All 9 maps used in new alignment

\*

3 populated classes result

Final dataset of 1,953 sub-volumes

54 pore

pore 14

1123

pore 90

776 pore

30

383 prepore

177 prepore

50 prepore

263 prepore

72 prepore

65 pore

99 prepore

pore 92

pore 62

93 pore

501

307 pore

pore 27

93

31 pore

Shaded maps used in new alignment after centring pore

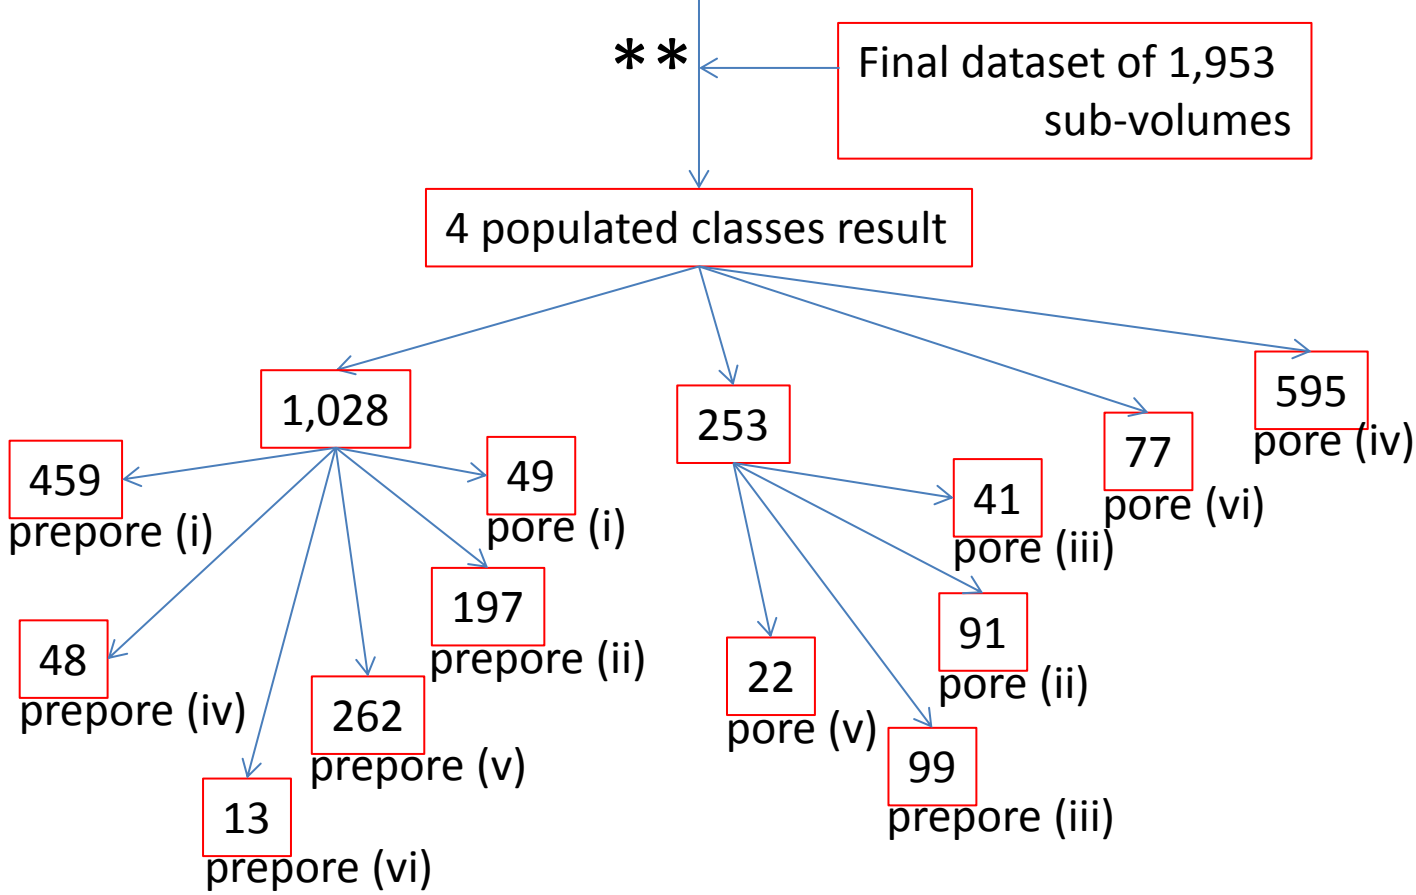

Supplement: rsob140044supp1.pdf [file rsob140044supp1.pdf]
